# Supplementary material for: Tanshinone IIA synergistically enhances the antitumor activity of doxorubicin by interfering with the PI3K/AKT/mTOR pathway and inhibition of topoisomerase II: in vitro and molecular docking studies
Source: Royal Society of Chemistry journal article supplement (doi:10.1039/d0nj04088f), 2020-01-01

## Supplementary Data

### 2D representation of Dox as a potent DNA intercalator and inhibitor for the progression of topoisomerase II

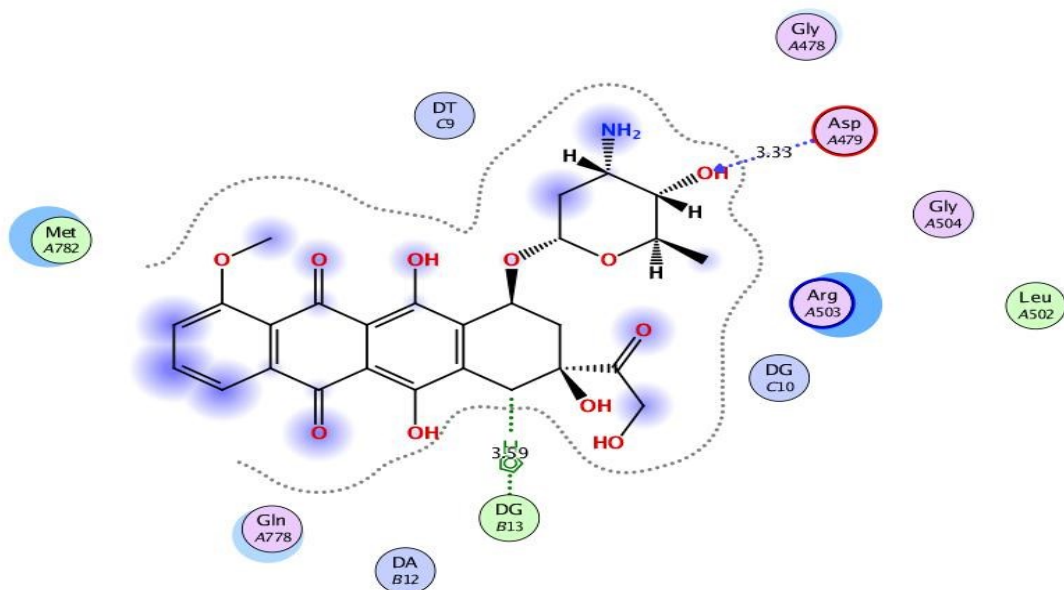

### 2D representation of Tan IIA as a potent DNA intercalator and inhibitor for the progression of topoisomerase II

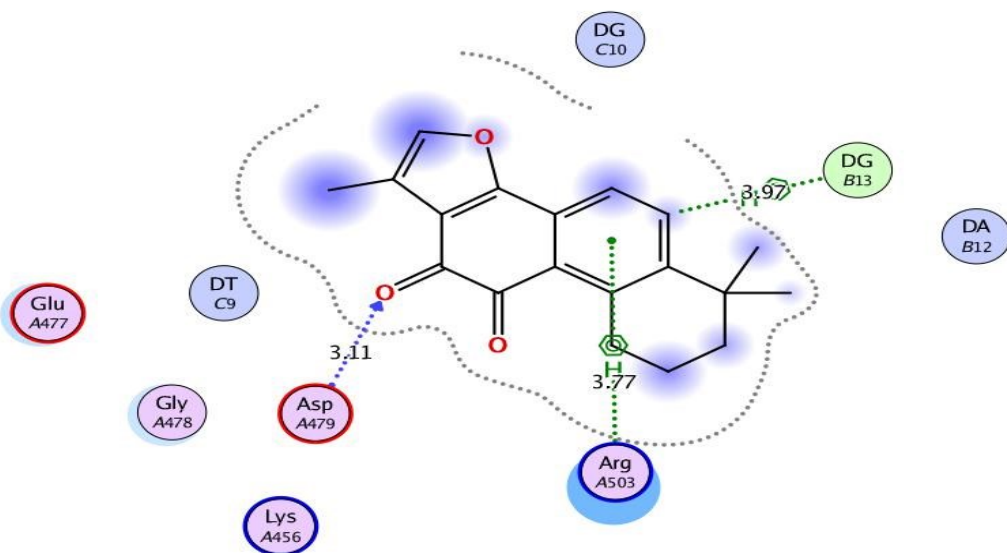

Supplement: d0nj04088f1.pdf [file d0nj04088f1.pdf]
